# Supplementary material
Source: Research Square preprint supplement (doi:10.21203/rs.3.rs-9450434/v1)
Supplement: Supplementary file 1 [file 884c3dfb177d33c64aabd618.pdf]

## Supplementary Information

### High-Throughput Discovery of $\text{Li}_3\text{Sc}_2(\text{PO}_4)_3$ as a Protective Coating for Stabilizing Mid-Ni NCM Interfaces in All-Solid-State Batteries

Ji Hoon Kim,<sup>1</sup> Seunghyun Lee<sup>2,3,4,\*</sup> and Sang Uck Lee<sup>1\*</sup>

<sup>1</sup>School of Chemical Engineering, Sungkyunkwan University, Suwon 16419, Republic of Korea

<sup>2</sup>Department of Applied Chemistry, Hanyang University ERICA, Ansan 15588, Republic of Korea.

<sup>3</sup> Center for Bionano Intelligence Education and Research, Hanyang University ERICA, Ansan 15588, Republic of Korea.

<sup>4</sup> Department of Energy and Bio Sciences, Hanyang University ERICA, Ansan 15588, Republic of Korea.

\* indicates the corresponding author

\* Corresponding author: Seunghyun Lee, Sang Uck Lee

Tel.: +82-31-290-7343

E-mail address: leeshyun@hanyang.ac.kr and suleechem@skku.edu

## Supporting figures and notes

### Ionic conductivity calculation

To obtain the Li-ion diffusivity, we should have Mean-Squared Displacement (MSD). The MSD of mobile ions can be calculated from the average displacements over time duration  $t$ , where  $r_i(t)$  is the position of a mobile ion.

$$MSD = \frac{1}{N} \sum_i \langle [r_i(t + t_0)]^2 - [r_i(t_0)]^2 \rangle \quad (\text{eq1})$$

The diffusivity ( $D$ ) can be calculated the movement of mobile ions per time from trajectories generated as a result of AIMD simulations.

$$D = \frac{1}{2dt} MSD \quad (\text{eq2})$$

We can calculate the Li-ion diffusivity of specific temperature because ion diffusivity follows an Arrhenius relationship in no phase transition solid. After attaining each diffusivity of calculated temperatures, we extrapolated the Li-ion diffusivity of specific temperature from an Arrhenius fitting using equation (3).

$$D = D_0 \exp\left(-\frac{E_a}{kT}\right) \quad (\text{eq3})$$

Here,  $D_0$  is diffusivity at infinite temperature,  $E_a$  is the activation energy of diffusion,  $k$  is the Boltzmann constant and  $T$  is the calculated temperature.  $E_a$  can calculate from the linear fitting of  $\log(D)$  versus  $1/T$ . The ionic conductivity  $\sigma_T$  of a specific temperature can be obtained using the Li-ion diffusivity of specific temperatures from the Nernst-Einstein relation:

$$\sigma_T = \frac{\rho z^2 F^2}{RT} D_T \quad (\text{eq4})$$

where  $\rho$  is the molar density of mobile ions in a unit cell,  $z$  is the charge of mobile ions,  $F$  is Faraday's constant,  $R$  is the gas constant,  $T$  is temperature and  $D_T$  is the Li-ion diffusivity of a specific temperature.

## Electrochemical stability window calculation

The electrochemical stability window was determined using a methodology consistent with previous first-principles studies on solid-state electrolytes (SSEs).<sup>1, 2</sup> In this approach, electrochemical stability is evaluated by examining the phase behavior of the material under different lithium chemical potentials ( $\mu_{Li}$ ), which correspond to a range of electrode voltage. To quantify this, we constructed grand potential phase diagrams at 0 K, which describe the thermodynamic stability of each compound in contact with lithium at a given chemical potential. For a given composition  $c$ , the grand potential  $\Phi$  is defined as:

$$\Phi[c, \mu_{Li}] = E[c] - n_{Li}[c] \cdot \mu_{Li} \quad (\text{eq5})$$

where  $E[c]$  is the DFT total energy of compound  $c$ ,  $n_{Li}[c]$  is the Li concentration of composition  $c$ . Phase stability is then evaluated by determining whether the compound lies on the lower convex hull of the grand potential diagram across a range of values (0 to -5 eV, corresponding to 0-7 V vs. Li/Li<sup>+</sup>). Compounds that remain on the convex hull across a range of  $\mu_{Li}$  are considered stable within that interval. The upper and lower of this interval ( $\mu_{ox}, \mu_{red}$ ) define the electrochemical stability window, which is converted to voltage using:

$$V_{red} = \frac{\mu_{Li}^0 - \mu_{red}}{e} \quad (\text{eq6})$$

$$V_{ox} = \frac{\mu_{Li}^0 - \mu_{ox}}{e} \quad (\text{eq7})$$

where  $\mu_{Li}^0$  is the chemical potential of lithium metal and  $e$  is the elementary charge.

## Chemical mixing reaction energy calculation

To evaluate the chemical compatibility between coating materials and SSEs or cathode interfaces, we calculated the chemical mixing reaction energy ( $\Delta E_{mix}$ ).<sup>3</sup> This thermodynamic descriptor quantifies the driving force for interfacial chemical reactions and indicates whether a spontaneous reaction is expected upon contact.

For two reactant phases  $A$  and  $B$ , the reaction energy was determined by identifying the most stable combination of reaction products that could form from their mixture. The mixing ratio  $x \in [0, 1]$  was varied continuously, and the most favorable product configuration was obtained by minimizing the reaction energy:

$$\Delta E_{mix} = \min_{x \in [0,1]} \{E_{pd}[xc_A + (1-x)c_B] - xE[c_A] - (1-x)E[c_B]\} \quad (\text{eq8})$$

Here,  $c_A$  and  $c_B$  are the atomic compositions of materials  $A$  and  $B$ , normalized by the total number of atoms;  $E[c_A]$  and  $E[c_B]$  are their DFT total energies; and  $E_{pd}[c]$  is the energy of the most stable decomposition phase (i.e., the convex hull energy) at composition  $c$ . The resulting  $\Delta E_{mix}$  is expressed in units of eV/atom. A large negative  $\Delta E_{mix}$  represents a strong thermodynamics tendency for reaction at the interface, potentially leading to the formation of electronically insulating or ion-blocking layers. Conversely, a value close to 0 suggests chemical compatibility.



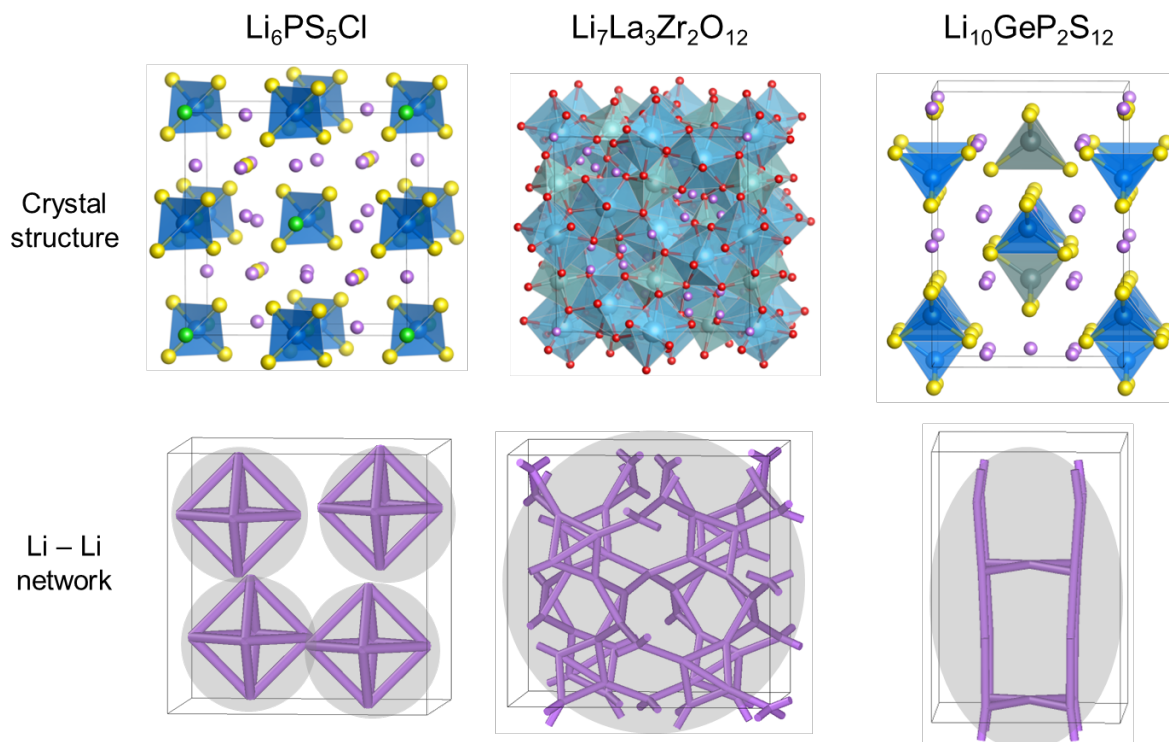

**Figure S2.** Representative solid-state electrolyte crystal structures (top) with high ionic conductivity and corresponding Li – Li connectivity networks (bottom):  $\text{Li}_6\text{PS}_5\text{Cl}$ ,  $\text{Li}_7\text{La}_3\text{Zr}_2\text{O}_{12}$ , and  $\text{Li}_{10}\text{GeP}_2\text{S}_{12}$ . The Li–Li network is visualized to distinct ion transport pathway formed by Li–Li connections ( $\leq 3.5 \text{ \AA}$ )

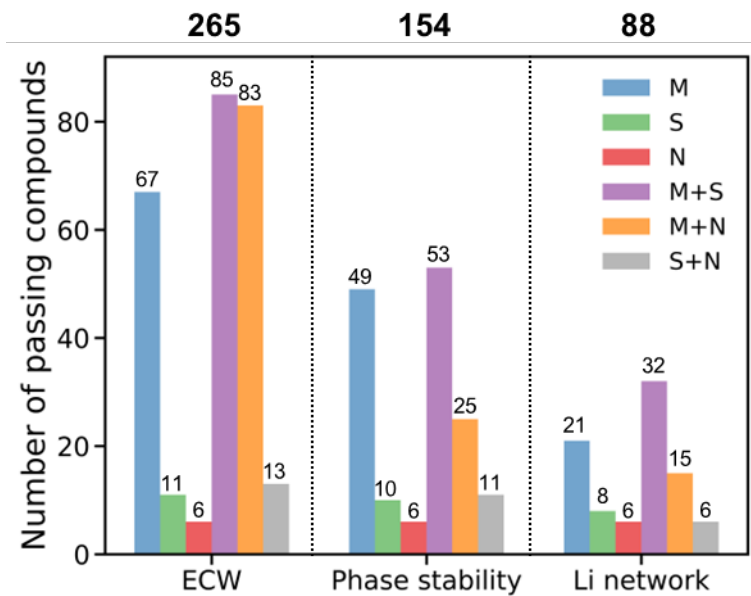

**Figure S3.** Histogram showing the number of candidates in each elemental category that pass through each filtering step in the high-throughput screening process. Blue, green, red, purple, orange, and gray bars represent materials containing metal (M), semi-metal (S), non-metal (N), metal + semi-metal (M+S), metal + non-metal (M+N), and semi-metal + non-metal (S+N), respectively, excluding Li and O.

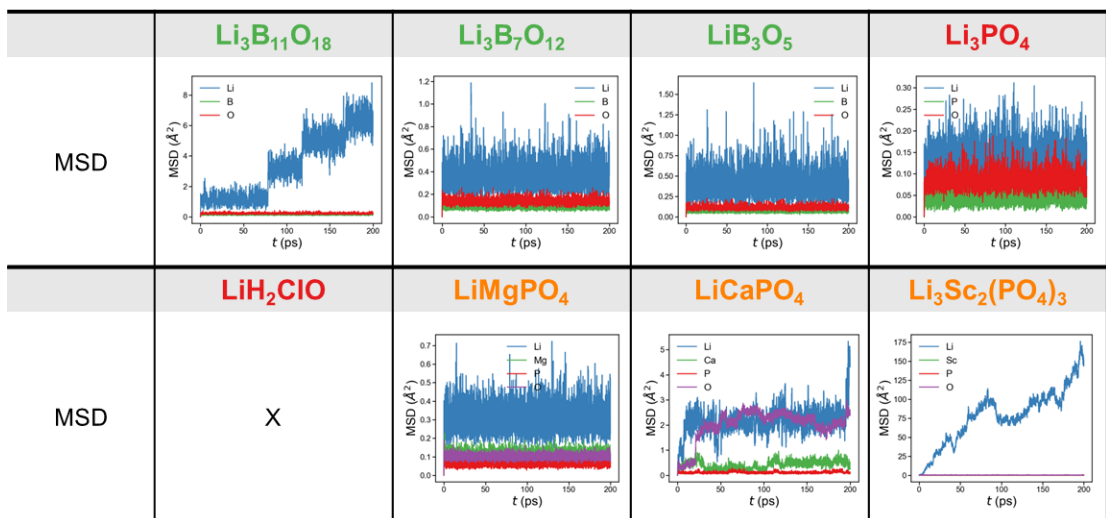

**Figure S4.** Mean squared displacement (MSD) of Li and framework atoms for 8 representative crystal structures, obtained from AIMD simulations during 200 ps at 1000 K.  $\text{LiH}_2\text{ClO}$  was excluded from the evaluation due to the detachment of H from  $\text{H}_2\text{O}$ .

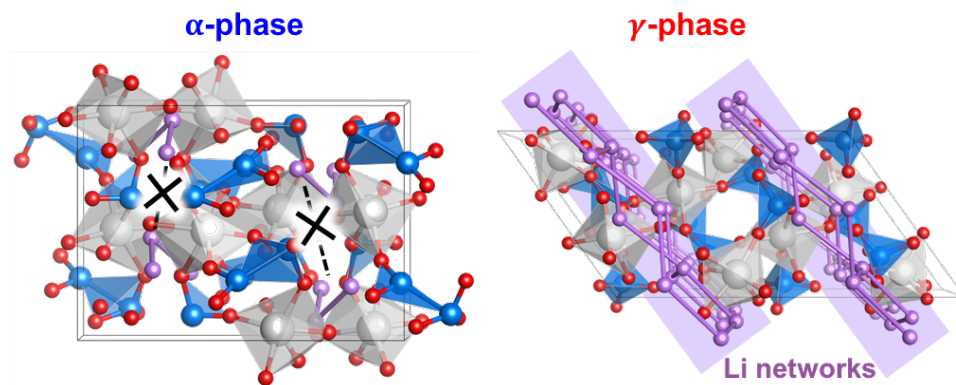

**Figure S5.** Li-ion networks pathway in two crystal structures for  $\alpha$ - and  $\gamma$ -phases. The purple shaded regions highlight Li–Li networks within 3.5 Å.

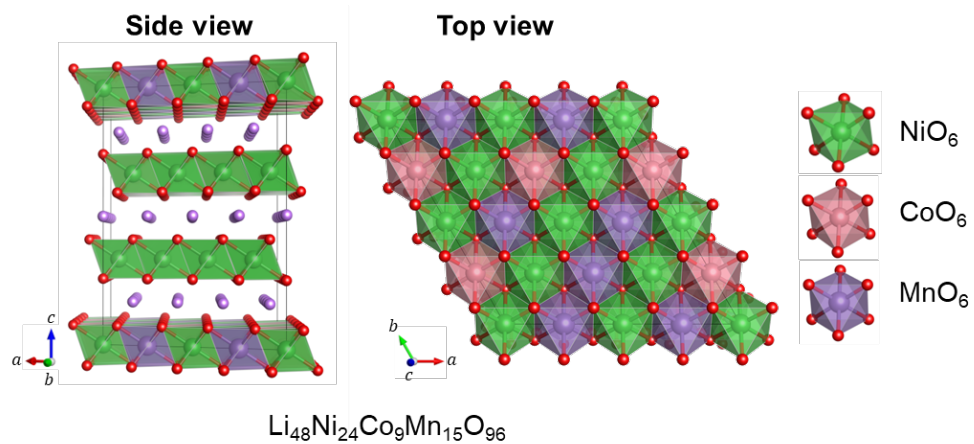

**Figure S6.** Crystal structure of  $\text{LiNi}_{0.5}\text{Co}_{0.2}\text{Mn}_{0.3}\text{O}_2$  (NCM523) used in this study for molecular dynamics simulations, according to viewing perspective.

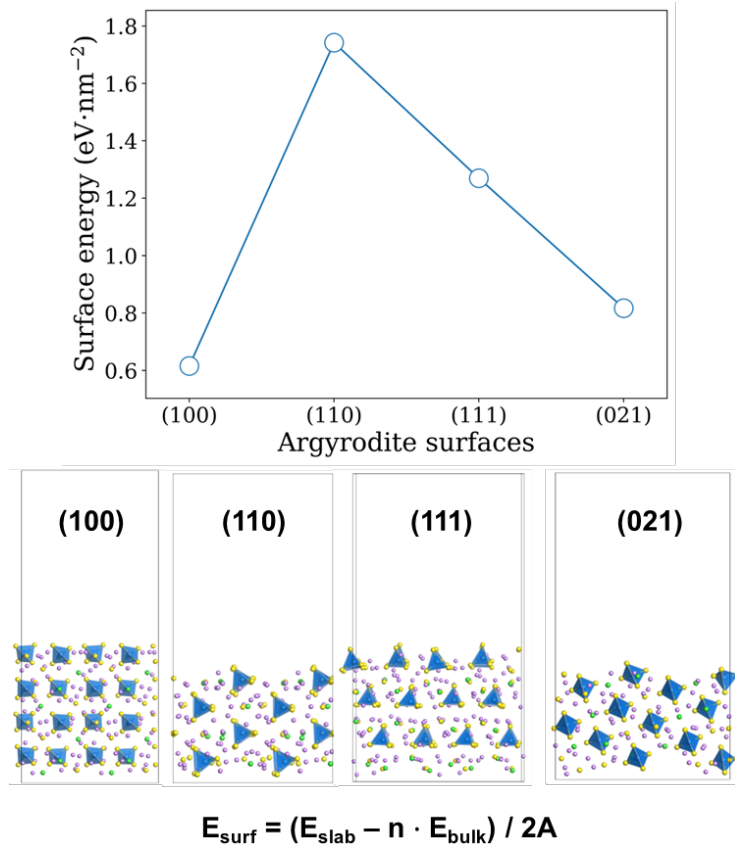

**Figure S7.** Calculated surface energies and models of Li<sub>6</sub>PS<sub>5</sub>Cl according to its surface indices.

**Table S1.** Representative 88 crystal structures screened in high-throughput screening process along with their database source, electrochemical window, interfacial stability, band gap, number of Li–Li networks, and max number of containing Li. Each category represents metal (M), semi-metal (S), non-metal (N), metal + semi-metal (M+S), metal + non-metal (M+N), and semi-metal + non-metal (S+N), respectively, excluding Li and O.

| <i>Composition</i>                                                | <i>Category</i> | <i>mp-ID</i> | <i>v1</i> | <i>v2</i> | <i>ECW</i> | $\Delta E_{rxn}$<br><i>NCM523</i> | $\Delta E_{rxn}$<br><i>LPSC</i> | <i>Band gap</i> | <i>Li networks</i> | <i>Max number of Li</i> |
|-------------------------------------------------------------------|-----------------|--------------|-----------|-----------|------------|-----------------------------------|---------------------------------|-----------------|--------------------|-------------------------|
|                                                                   |                 |              | (V)       | (V)       | (V)        | (meV<br>/atom)                    | (meV<br>/atom)                  | (eV)            | (count)            | (count)                 |
| <i>Li<sub>2</sub>BaTi<sub>6</sub>O<sub>14</sub></i>               | M               | 558083       | 1.47      | 3.85      | 2.38       | -7.56                             | -68.35                          | 2.94            | 4                  | 2                       |
| <i>Li<sub>3</sub>SrTa<sub>2</sub>O<sub>7</sub></i>                | M               | 558054       | 1.09      | 3.55      | 2.46       | 0                                 | -52.59                          | 2.27            | 1                  | 4                       |
| <i>Li<sub>2</sub>CaTa<sub>2</sub>O<sub>7</sub></i>                | M               | 1194523      | 1.05      | 3.57      | 2.52       | 0                                 | -50.15                          | 2.81            | 2                  | 4                       |
| <i>Li<sub>2</sub>TiO<sub>3</sub></i>                              | M               | 2931         | 0.50      | 3.68      | 3.18       | 0                                 | -60.12                          | 3.03            | 1                  | 8                       |
| <i>Li<sub>3</sub>TaO<sub>4</sub></i>                              | M               | 3151         | 0.55      | 3.57      | 3.02       | 0                                 | -47.80                          | 4               | 1                  | 12                      |
| <i>Li<sub>3</sub>NbO<sub>4</sub></i>                              | M               | 31488        | 0.96      | 3.60      | 2.65       | 0                                 | -96.12                          | 3.84            | 1                  | 12                      |
| <i>Li<sub>4</sub>Ti<sub>5</sub>O<sub>12</sub></i>                 | M               | 685194       | 1.74      | 3.68      | 1.94       | -15.43                            | -64.44                          | 2.72            | 1                  | 8                       |
| <i>Li<sub>2</sub>Ti<sub>4</sub>O<sub>9</sub></i>                  | M               | 772151       | 1.74      | 3.68      | 1.94       | -17.62                            | -65.98                          | 2.89            | 2                  | 2                       |
| <i>Li<sub>2</sub>Ti<sub>3</sub>O<sub>7</sub></i>                  | M               | 1190132      | 1.74      | 3.68      | 1.94       | -16.45                            | -65.10                          | 2.98            | 1                  | 4                       |
| <i>LiNdTiO<sub>4</sub></i>                                        | M               | 10520        | 0.55      | 3.54      | 2.99       | 0                                 | -78.02                          | 2.28            | 1                  | 2                       |
| <i>Li<sub>15</sub>Ti<sub>11</sub>Nb<sub>5</sub>O<sub>42</sub></i> | M               | 767393       | 1.82      | 3.68      | 1.87       | -11.68                            | -82.74                          | 2.27            | 2                  | 4                       |

---

|                                                                        |   |         |      |      |      |        |        |      |   |   |
|------------------------------------------------------------------------|---|---------|------|------|------|--------|--------|------|---|---|
| <i>LiLaTiO<sub>4</sub></i>                                             | M | 6521    | 0.50 | 3.53 | 3.03 | -78.45 | -81.32 | 2.26 | 1 | 2 |
| <i>Li<sub>2</sub>Ti<sub>2</sub>O<sub>5</sub></i>                       | M | 756294  | 1.74 | 3.68 | 1.94 | -7.84  | -63.55 | 3.80 | 1 | 4 |
| <i>Li<sub>7</sub>Ti<sub>12</sub>Nb<br/>O<sub>30</sub></i>              | M | 767146  | 1.82 | 3.68 | 1.87 | -10.84 | -71.19 | 2.62 | 1 | 2 |
| <i>Li<sub>4</sub>Ti<sub>9</sub>O<sub>20</sub></i>                      | M | 772090  | 1.74 | 3.68 | 1.94 | -11.95 | -66.30 | 3.13 | 2 | 4 |
| <i>Li<sub>10</sub>Ti<sub>11</sub>Nb<br/><sub>6</sub>O<sub>42</sub></i> | M | 767498  | 1.82 | 3.68 | 1.87 | 0      | -88.70 | 2.19 | 1 | 2 |
| <i>Li<sub>4</sub>Ti<sub>11</sub>O<sub>24</sub></i>                     | M | 766548  | 1.74 | 3.68 | 1.94 | 0      | -66.77 | 2.57 | 1 | 3 |
| <i>Li<sub>4</sub>Ba<sub>4</sub>Ti<sub>19</sub><br/>O<sub>44</sub></i>  | M | 762032  | 1.75 | 3.85 | 2.10 | -1.43  | -72.60 | 2.33 | 1 | 3 |
| <i>Li<sub>7</sub>Ti<sub>7</sub>Nb<sub>5</sub><br/>O<sub>30</sub></i>   | M | 767392  | 1.82 | 3.68 | 1.87 | 0      | -98.34 | 2.12 | 1 | 2 |
| <i>Li<sub>4</sub>Ti<sub>3</sub>O<sub>8</sub></i>                       | M | 755266  | 1.74 | 3.68 | 1.94 | 0      | -62.23 | 2.17 | 1 | 4 |
| <i>Li<sub>3</sub>Ta<sub>7</sub>O<sub>19</sub></i>                      | M | 772220  | 1.59 | 3.93 | 2.34 | -21.46 | -45.05 | 2.87 | 2 | 3 |
| <i>Li<sub>2</sub>Si<sub>2</sub>O<sub>5</sub></i>                       | S | 4117    | 1.26 | 3.77 | 2.50 | -14.85 | 0      | 5.15 | 1 | 4 |
| <i>Li<sub>2</sub>SiO<sub>3</sub></i>                                   | S | 5012    | 0.76 | 3.72 | 2.96 | 0      | 0      | 5.08 | 1 | 4 |
| <i>Li<sub>3</sub>B<sub>11</sub>O<sub>18</sub></i>                      | S | 1020014 | 1.93 | 4.41 | 2.48 | -28.29 | 0      | 5.68 | 2 | 2 |
| <i>Li<sub>3</sub>B<sub>7</sub>O<sub>12</sub></i>                       | S | 16828   | 1.30 | 4.22 | 2.92 | -11.70 | 0      | 5.70 | 2 | 3 |
| <i>LiBO<sub>2</sub></i>                                                | S | 14232   | 1.07 | 3.66 | 2.59 | 0      | 0      | 7.28 | 1 | 2 |
| <i>Li<sub>2</sub>B<sub>4</sub>O<sub>7</sub></i>                        | S | 4779    | 1.29 | 3.66 | 2.37 | -10.78 | 0      | 5.81 | 2 | 4 |
| <i>Li<sub>2</sub>Si<sub>3</sub>O<sub>7</sub></i>                       | S | 555899  | 1.32 | 3.77 | 2.45 | -18.55 | 0      | 5.36 | 2 | 4 |
| <i>LiB<sub>3</sub>O<sub>5</sub></i>                                    | S | 3660    | 1.93 | 4.22 | 2.29 | -21.15 | 0      | 6.48 | 2 | 2 |

---

|                                                     |     |         |      |      |      |       |        |      |   |    |
|-----------------------------------------------------|-----|---------|------|------|------|-------|--------|------|---|----|
| <i>Li<sub>3</sub>PO<sub>4</sub></i>                 | N   | 13725   | 0.69 | 4.19 | 3.51 | 0     | 0      | 5.82 | 1 | 6  |
| <i>Li<sub>2</sub>SO<sub>4</sub></i>                 | N   | 4556    | 1.63 | 4.65 | 3.02 | 0     | -99.22 | 6.01 | 1 | 8  |
| <i>Li<sub>2</sub>CO<sub>3</sub></i>                 | N   | 3054    | 1.27 | 4.09 | 2.82 | 0     | -83.80 | 5.06 | 1 | 4  |
| <i>LiH<sub>2</sub>BrO</i>                           | N   | 754153  | 1.55 | 3.68 | 2.12 | -5.62 | 0      | 4.31 | 1 | 4  |
| <i>Li<sub>2</sub>H<sub>2</sub>SO<sub>5</sub></i>    | N   | 23849   | 1.99 | 4.40 | 2.41 | 0     | -90.79 | 5.58 | 1 | 4  |
| <i>LiH<sub>2</sub>ClO</i>                           | N   | 760502  | 1.54 | 4.07 | 2.53 | 0     | -22.15 | 5.31 | 1 | 4  |
| <i>LiTmSiO<sub>4</sub></i>                          | M+S | 15066   | 0.84 | 3.65 | 2.81 | 0     | 0      | 4.87 | 2 | 2  |
| <i>LiYSiO<sub>4</sub></i>                           | M+S | 558941  | 0.74 | 3.61 | 2.87 | 0     | -46.01 | 5.27 | 2 | 2  |
| <i>LiScSiO<sub>4</sub></i>                          | M+S | 6224    | 1.08 | 3.77 | 2.70 | -3.15 | 0      | 4.61 | 2 | 2  |
| <i>Li<sub>2</sub>TiSiO<sub>5</sub></i>              | M+S | 6332    | 1.47 | 3.81 | 2.34 | -7.0  | 0      | 3.22 | 1 | 4  |
| <i>LiSrBO<sub>3</sub></i>                           | M+S | 10814   | 0.32 | 3.54 | 3.23 | 0     | -95.69 | 4.36 | 2 | 2  |
| <i>LiKSi<sub>2</sub>O<sub>5</sub></i>               | M+S | 558102  | 1.05 | 3.80 | 2.75 | -6.02 | 0      | 4.71 | 1 | 2  |
| <i>Li<sub>3</sub>AlSiO<sub>5</sub></i>              | M+S | 1020023 | 0.64 | 3.62 | 2.98 | 0     | 0      | 4.94 | 1 | 12 |
| <i>Li<sub>2</sub>BeSiO<sub>4</sub></i>              | M+S | 8070    | 0.50 | 3.87 | 3.37 | 0     | 0      | 6.06 | 1 | 4  |
| <i>Li<sub>3</sub>Gd(BO<sub>3</sub>)<sub>2</sub></i> | M+S | 559706  | 0.78 | 3.52 | 2.74 | 0     | -57.90 | 3.18 | 2 | 6  |
| <i>Li<sub>2</sub>MgSiO<sub>4</sub></i>              | M+S | 11189   | 0.52 | 3.71 | 3.20 | 0     | 0      | 4.76 | 1 | 8  |
| <i>Li<sub>6</sub>Tm(BO<sub>3</sub>)<sub>3</sub></i> | M+S | 1211340 | 0.88 | 3.51 | 2.63 | 0     | -49.85 | 4.80 | 1 | 24 |
| <i>LiKB<sub>4</sub>O<sub>7</sub></i>                | M+S | 6648    | 1.16 | 3.74 | 2.58 | -2.83 | 0      | 5.34 | 4 | 2  |

|                                                                  |     |         |      |      |      |        |        |      |   |   |
|------------------------------------------------------------------|-----|---------|------|------|------|--------|--------|------|---|---|
| <i>LiRbB<sub>4</sub>O<sub>7</sub></i>                            | M+S | 6787    | 1.13 | 3.73 | 2.60 | -2.77  | 0      | 5.14 | 4 | 2 |
| <i>Li<sub>4</sub>Ca(BO<sub>3</sub>)<sub>2</sub></i>              | M+S | 557467  | 0.40 | 3.50 | 3.10 | 0      | -73.07 | 4.73 | 2 | 4 |
| <i>Li<sub>4</sub>Cs<sub>3</sub>(BO<sub>3</sub>)<sub>7</sub></i>  | M+S | 1019615 | 0.91 | 3.59 | 2.68 | 0      | -48.71 | 4.53 | 3 | 4 |
| <i>Li<sub>3</sub>Sc(BO<sub>3</sub>)<sub>2</sub></i>              | M+S | 557012  | 0.95 | 3.56 | 2.61 | 0      | -51.53 | 4.52 | 1 | 6 |
| <i>Li<sub>4</sub>Cs(BO<sub>2</sub>)<sub>5</sub></i>              | M+S | 1019716 | 0.96 | 3.57 | 2.61 | 0      | 0      | 4.66 | 2 | 8 |
| <i>Li<sub>3</sub>Cs<sub>2</sub>(BO<sub>3</sub>)<sub>7</sub></i>  | M+S | 1019607 | 0.96 | 3.57 | 2.61 | 0      | 0      | 4.53 | 2 | 4 |
| <i>Li<sub>6</sub>Rb<sub>5</sub>(BO<sub>3</sub>)<sub>11</sub></i> | M+S | 1020620 | 0.98 | 3.52 | 2.54 | 0      | -59.13 | 4.51 | 1 | 6 |
| <i>Li<sub>3</sub>Cs<sub>2</sub>(BO<sub>3</sub>)<sub>5</sub></i>  | M+S | 966802  | 0.96 | 3.57 | 2.61 | 0      | -48.20 | 4.54 | 2 | 3 |
| <i>Li<sub>3</sub>Rb<sub>2</sub>(BO<sub>3</sub>)<sub>7</sub></i>  | M+S | 1020664 | 1    | 3.54 | 2.54 | 0      | 0      | 4.63 | 2 | 4 |
| <i>Li<sub>2</sub>Ca<sub>2</sub>Si<sub>5</sub>O<sub>13</sub></i>  | M+S | 560247  | 1.32 | 3.77 | 2.45 | -14.52 | 0      | 4.94 | 1 | 4 |
| <i>Li<sub>2</sub>Ca<sub>2</sub>Si<sub>2</sub>O<sub>7</sub></i>   | M+S | 1020009 | 0.81 | 3.56 | 2.74 | 0      | -66.21 | 4.74 | 6 | 2 |
| <i>LiBeBO<sub>3</sub></i>                                        | M+S | 1020026 | 1.07 | 3.66 | 2.59 | -2.40  | 0      | 6.08 | 1 | 2 |
| <i>Li<sub>2</sub>AlBO<sub>4</sub></i>                            | M+S | 556655  | 1.02 | 3.67 | 2.66 | 0      | 0      | 5.03 | 1 | 8 |
| <i>Li<sub>3</sub>Al(SiO<sub>4</sub>)<sub>2</sub></i>             | M+S | 1222486 | 0.76 | 3.62 | 2.86 | 0      | 0      | 4.56 | 1 | 5 |
| <i>Li<sub>2</sub>Mg<sub>2</sub>Si<sub>4</sub>O<sub>11</sub></i>  | M+S | 561336  | 1.32 | 3.77 | 2.45 | -16.81 | 0      | 5.13 | 2 | 2 |
| <i>Li<sub>3</sub>Al(BO<sub>3</sub>)<sub>2</sub></i>              | M+S | 6097    | 1.07 | 3.66 | 2.59 | 0      | 0      | 4.82 | 1 | 6 |
| <i>Li<sub>2</sub>Al<sub>2</sub>SiO<sub>6</sub></i>               | M+S | 1222720 | 1.10 | 3.68 | 2.58 | 0      | 0      | 4.63 | 1 | 2 |
| <i>Li<sub>2</sub>Ti(BO<sub>3</sub>)<sub>2</sub></i>              | M+S | 759926  | 1.74 | 3.68 | 1.94 | 0      | -42.51 | 2.95 | 2 | 4 |

|                            |     |         |      |      |      |        |        |      |   |    |
|----------------------------|-----|---------|------|------|------|--------|--------|------|---|----|
| $Li_2MgSi_5$<br>$O_{12}$   | M+S | 1222909 | 1.32 | 3.77 | 2.45 | 0      | -8.86  | 5.16 | 2 | 4  |
| $Li_3Co(BO_2)_5$           | M+S | 768669  | 1.91 | 3.66 | 1.75 | 0      | -39.91 | 3.05 | 2 | 4  |
| $Li_2Ta_2(OF_2)_3$         | M+N | 561011  | 1.70 | 4.83 | 3.13 | -57.34 | -62.46 | 3.84 | 3 | 2  |
| $Li_3Sc_2(PO_4)_3$         | M+N | 6565    | 1.86 | 4.19 | 2.33 | -37.30 | -24.69 | 4.76 | 2 | 6  |
| $LiMgPO_4$                 | M+N | 9625    | 1.58 | 4.18 | 2.61 | -20.62 | 0      | 5.43 | 2 | 2  |
| $Li_2NaPO_4$               | M+N | 558045  | 0.71 | 3.99 | 3.29 | 0      | 0      | 5.34 | 2 | 4  |
| $LiMnPO_4$                 | M+N | 18997   | 1.88 | 3.78 | 1.90 | -64.81 | -52.25 | 3.41 | 2 | 2  |
| $LiNa_5(PO_4)_2$           | M+N | 559452  | 0.73 | 3.89 | 3.15 | 0      | -74.06 | 4.52 | 4 | 2  |
| $LiCaPO_4$                 | M+N | 16804   | 1.17 | 4.08 | 2.91 | 0      | -28.06 | 5.18 | 2 | 3  |
| $Li_3V(H_6O_5)_2$          | M+N | 1193122 | 1.88 | 3.94 | 2.06 | 0      | -90.80 | 4.07 | 1 | 3  |
| $Li_4Mn(PO_4)_2$           | M+N | 26081   | 1.88 | 3.78 | 1.90 | -44.07 | 0      | 4.13 | 1 | 16 |
| $Li_3Na_5Ti_5$<br>$O_{14}$ | M+N | 774609  | 1.40 | 3.60 | 2.20 | 0      | -96.10 | 3.14 | 1 | 3  |
| $LiMn_4(PO_4)_3$           | M+N | 26393   | 1.97 | 3.78 | 1.81 | -76.64 | -74.53 | 3.37 | 2 | 2  |
| $Li_3Mn_2(PO_4)_3$         | M+N | 849398  | 1.88 | 3.78 | 1.90 | -51.91 | -41.63 | 4.11 | 1 | 20 |
| $Li_6Mn_9(PO_4)_8$         | M+N | 25923   | 1.97 | 3.78 | 1.81 | -69.51 | -65.12 | 3.13 | 2 | 2  |
| $Li_4Mn_7(PO_4)_6$         | M+N | 849324  | 1.97 | 3.78 | 1.81 | -71.05 | -67.11 | 2.98 | 1 | 3  |
| $Li_6Mn_3(PO_4)_4$         | M+N | 780723  | 1.88 | 3.78 | 1.90 | -55.39 | -48.27 | 3.37 | 1 | 18 |
| $Li_2B_3O_4F_3$            | S+N | 1196457 | 1.87 | 4.44 | 2.57 | -62.11 | 0      | 6.57 | 2 | 4  |

---

|                           |     |         |      |      |      |        |   |      |   |    |
|---------------------------|-----|---------|------|------|------|--------|---|------|---|----|
| $Li_3B_5(HO_5)_2$         | S+N | 1199091 | 1.66 | 3.86 | 2.20 | -3.88  | 0 | 5.83 | 2 | 6  |
| $Li_{10}B_{14}Cl_2O_{25}$ | S+N | 23122   | 1.26 | 3.52 | 2.25 | -17.02 | 0 | 6.40 | 1 | 10 |
| $Li_4B_7ClO_1_2$          | S+N | 1222565 | 1.37 | 4    | 2.62 | -21.62 | 0 | 5.87 | 2 | 4  |
| $Li_2B_4H_4O_9$           | S+N | 604459  | 1.91 | 3.83 | 1.92 | -5.41  | 0 | 5.15 | 1 | 14 |
| $LiB_3H_3O_5$             | S+N | 24560   | 1.91 | 3.83 | 1.92 | -4.74  | 0 | 5.02 | 4 | 2  |

---

**Table S2.** Representative 8 crystal structures screened in high-throughput screening process along with their database source, electrochemical window, thermodynamic stability, band gap, and Li – Li networks.

|                                                                 | <i>mp-ID</i>                 | <i>[V1, V2]</i><br><i>ECW</i>      | $\Delta E_{rxn}$ w/.<br><i>NCM523</i><br>( <i>meV</i> ) | $\Delta E_{rxn}$ w/.<br><i>LPSC</i><br>( <i>meV</i> ) | <i>Band gap</i><br>( <i>eV</i> ) | <i>N of Li</i><br><i>networks</i> | <i>Max N of</i><br><i>Li</i><br><i>networks</i> |
|-----------------------------------------------------------------|------------------------------|------------------------------------|---------------------------------------------------------|-------------------------------------------------------|----------------------------------|-----------------------------------|-------------------------------------------------|
| <i>Li<sub>3</sub>Sc<sub>2</sub>(PO<sub>4</sub>)<sub>3</sub></i> | <i>mp-6565</i>               | <i>[1.86,</i><br><i>4.19]</i> 2.33 | -37.30                                                  | -24.69                                                | 4.76                             | 2                                 | 6                                               |
| <i>LiCaPO<sub>4</sub></i>                                       | <i>mp-16804</i>              | <i>[1.17,</i><br><i>4.08]</i> 2.91 | 0                                                       | -28.06                                                | 5.18                             | 2                                 | 3                                               |
| <i>LiMgPO<sub>4</sub></i>                                       | <i>mp-9625</i>               | <i>[1.58,</i><br><i>4.18]</i> 2.61 | -20.62                                                  | 0                                                     | 5.43                             | 2                                 | 2                                               |
| <i>LiH<sub>2</sub>ClO</i>                                       | <i>mp-</i><br><i>760502</i>  | <i>[1.54,</i><br><i>4.07]</i> 2.53 | 0                                                       | -22.15                                                | 5.31                             | 1                                 | 4                                               |
| <i>Li<sub>3</sub>PO<sub>4</sub></i>                             | <i>mp-13725</i>              | <i>[0.69,</i><br><i>4.19]</i> 3.51 | 0                                                       | 0                                                     | 5.82                             | 1                                 | 6                                               |
| <i>LiB<sub>3</sub>O<sub>5</sub></i>                             | <i>mp-3660</i>               | <i>[1.93,</i><br><i>4.22]</i> 2.29 | -21.15                                                  | 0                                                     | 6.48                             | 2                                 | 2                                               |
| <i>Li<sub>3</sub>B<sub>7</sub>O<sub>12</sub></i>                | <i>mp-16828</i>              | <i>[1.30,</i><br><i>4.22]</i> 2.92 | -11.70                                                  | 0                                                     | 5.70                             | 2                                 | 3                                               |
| <i>Li<sub>3</sub>B<sub>11</sub>O<sub>18</sub></i>               | <i>mp-</i><br><i>1020014</i> | <i>[1.93,</i><br><i>4.41]</i> 2.48 | -28.29                                                  | 0                                                     | 5.68                             | 2                                 | 2                                               |

**Table S3.** Chemical reaction products of 8 representative candidates from the most favorable reactions at NCM523 and LPSC interfaces.

| Reaction products                       |                                                                                                                                                                                            |                                                                               |
|-----------------------------------------|--------------------------------------------------------------------------------------------------------------------------------------------------------------------------------------------|-------------------------------------------------------------------------------|
|                                         | NCM523                                                                                                                                                                                     | LPSC                                                                          |
| $\text{Li}_3\text{Sc}_2(\text{PO}_4)_3$ | $\text{Mn}(\text{Ni}_3\text{O}_4)_2, \text{Ni}_3\text{O}_4, \text{Li}_4\text{MnCo}_5\text{O}_{12},$<br>$\text{Li}_2\text{Mn}_3\text{NiO}_8, \text{Li}_3\text{PO}_4, \text{Sc}_2\text{O}_3$ | $\text{LiScS}_2, \text{Li}_3\text{PS}_4, \text{Li}_3\text{PO}_4, \text{LiCl}$ |
| $\text{LiCaPO}_4$                       | Stable                                                                                                                                                                                     | $\text{Li}_3\text{PS}_4, \text{Li}_3\text{PO}_4, \text{CaS}, \text{LiCl}$     |
| $\text{LiMgPO}_4$                       | $\text{Li}_2\text{MgMn}_3\text{O}_8, \text{Ni}_3\text{O}_4, \text{Li}_4\text{MnCo}_5\text{O}_{12},$<br>$\text{Mg}_6\text{MnO}_8, \text{NiO}, \text{Li}_3\text{PO}_4$                       | Stable                                                                        |
| $\text{LiH}_2\text{ClO}$                | Stable                                                                                                                                                                                     | $\text{Li}_3\text{PS}_4, \text{Li}_3\text{PO}_4, \text{LiHS}, \text{LiCl}$    |
| $\text{Li}_3\text{PO}_4$                | Stable                                                                                                                                                                                     | Stable                                                                        |
| $\text{LiB}_3\text{O}_5$                | $\text{LiO}_8, \text{Li}_4\text{MnCo}_5\text{O}_{12}, \text{Li}_2\text{Mn}_3\text{NiO}_8,$<br>$\text{Ni}_3\text{BO}_5, \text{LiBO}_2$                                                      | Stable                                                                        |
| $\text{Li}_3\text{B}_7\text{O}_{12}$    | $\text{LiO}_8, \text{Li}_4\text{MnCo}_5\text{O}_{12}, \text{Li}_2\text{Mn}_3\text{NiO}_8,$<br>$\text{Ni}_3\text{BO}_5, \text{LiBO}_2$                                                      | Stable                                                                        |
| $\text{Li}_3\text{B}_{11}\text{O}_{18}$ | $\text{LiO}_8, \text{Li}_2\text{Mn}_3\text{NiO}_8, \text{Ni}_3\text{BO}_5,$<br>$\text{Co}_3(\text{BO}_3)_2, \text{Li}_3\text{B}_7\text{O}_{12}$                                            | Stable                                                                        |

**Table S4.** Lattice parameters and energy/atom of  $\text{Li}_3\text{Sc}_2(\text{PO}_4)_3$  according to crystal structure phases. The crystal structures are shown in Figure 4(a).

|                       | $\alpha$ -phase | $\gamma$ -phase |
|-----------------------|-----------------|-----------------|
| Energy/atom (eV/atom) | -7.205          | -7.565          |
| a (Å)                 | 8.8483          | 8.8290          |
| b (Å)                 | 12.2737         | 8.7980          |
| c (Å)                 | 8.7959          | 15.0495         |
| $\gamma$ (°)          | 90              | 125.6           |
| Space group           | $P2_1/c$        | $P2_1/c$        |

## References

1. SP Ong, Y Mo, WD Richards, L Miara, HS Lee, G Ceder, Phase stability, electrochemical stability and ionic conductivity of the  $\text{Li}_{10\pm 1}\text{MP}_2\text{X}_{12}$  ( $M = \text{Ge, Si, Sn, Al or P}$ , and  $X = \text{O, S or Se}$ ) family of superionic conductors. *Energy Environ. Sci.* 6, 148–156 (2013). doi:10.1039/C2EE23355J.
2. WD Richards, LJ Miara, Y Wang, JC Kim, G Ceder, Interface stability in solid-state batteries. *Chem. Mater.* 28, 266–273 (2016). doi:10.1021/acs.chemmater.5b04082.
3. LJ Miara, WD Richards, YE Wang, G Ceder, First-principles studies on cation dopants and electrolyte|cathode interphases for lithium garnets. *Chem. Mater.* 27, 4040–4047 (2015). doi:10.1021/acs.chemmater.5b01023.
